# Supplementary material for: Cd2+-Selective Fluorescence Enhancement of Bisquinoline Derivatives with 2-Aminoethanol Skeleton
Source: MDPI journal article supplement (doi:10.3390/molecules29020369), 2024-01-11
Supplement: s1 [file s1]

Supplementary Materials for  
**Cd<sup>2+</sup>-Selective Fluorescence Enhancement of Bisquinoline Derivatives with 2-Aminoethanol Skeleton**

Yuji Mikata <sup>1,2,3,4,\*</sup>, Aya Tsuruta <sup>3</sup>, Hinata Koike <sup>4</sup>, Sunao Shoji <sup>1,4</sup>, and Hideo Konno <sup>5</sup>

<sup>1</sup>*Laboratory for Molecular & Functional Design, Department of Engineering, Nara Women's University, Nara 630-8506, Japan; mikata@nara-wu.ac.jp*

<sup>2</sup>*KYOUSEI Science Center, Nara Women's University, Nara 630-8506, Japan*

<sup>3</sup>*Department of Chemistry, Biology, and Environmental Science, Faculty of Science, Nara Women's University, Nara 630-8506, Japan*

<sup>4</sup>*Cooperative Major in Human Centered Engineering, Nara Women's University, Nara 630-8506, Japan*

<sup>5</sup>*National Institute of Advanced Industrial Science and Technology (AIST), 1-1-1 Higashi, Tsukuba, Ibaraki 305-8565, Japan*

*\*Correspondence: mikata@nara-wu.ac.jp*

## INDEX

*Preparation of ligands*.....S4

**Scheme S1.** Synthesis of ligands 1-6.

*Absorbance and excitation spectra*.....S5-S6

**Figure S1.** Absorbance spectral changes of 34  $\mu\text{M}$  *N,O*-BQMAE (1), 6-MeO-*N,O*-BQMAE (2), and TriMeO-*N,O*-BQMAE (3) in DMF-HEPES buffer (1:1, 50 mM HEPES, 0.1 M KCl, pH = 7.5) at 25 °C in the presence of increasing concentrations of  $\text{Cd}^{2+}$ . Excitation spectrum of 34  $\mu\text{M}$  TriMeO-*N,O*-BQMAE (3) in DMF-HEPES buffer (1:1, 50 mM HEPES, 0.1 M KCl, pH = 7.5) at 25 °C ( $\lambda_{\text{em}} = 445 \text{ nm}$ ).

**Figure S2.** Absorbance spectral changes of 34  $\mu\text{M}$  *N,N*-BQMAE (4), 6-MeO-*N,N*-BQMAE (5), and TriMeO-*N,N*-BQMAE (6) in DMF-HEPES buffer (1:1, 50 mM HEPES, 0.1 M KCl, pH = 7.5) at 25 °C in the presence of increasing concentrations of  $\text{Cd}^{2+}$ . Excitation spectrum of 34  $\mu\text{M}$  TriMeO-*N,N*-BQMAE (6) in DMF-HEPES buffer (1:1, 50 mM HEPES, 0.1 M KCl, pH = 7.5) at 25 °C ( $\lambda_{\text{em}} = 450 \text{ nm}$ ).

*Estimation of dissociation constants and LOD*.....S7-S12

**Figure S3.** Estimation of dissociation constants ( $K_d$ ) for TriMeO-*N,O*-BQMAE (3) with  $\text{Cd}^{2+}$  and  $\text{Zn}^{2+}$  in DMF-HEPES buffer (1:1, 50 mM HEPES, 0.1 M KCl, pH = 7.5) at 25 °C.

**Figure S4.** Estimation of dissociation constants ( $K_d$ ) for TriMeOBQDMEN with  $\text{Cd}^{2+}$  and  $\text{Zn}^{2+}$  in DMF-HEPES buffer (1:1, 50 mM HEPES, 0.1 M KCl, pH = 7.5) at 25 °C.

**Figure S5.** Estimation of dissociation constants ( $K_d$ ) for *N,N*-BQMAE (4) with  $\text{Cd}^{2+}$  and  $\text{Zn}^{2+}$  in DMF-HEPES buffer (1:1, 50 mM HEPES, 0.1 M KCl, pH = 7.5) at 25 °C.

**Figure S6.** Estimation of dissociation constants ( $K_d$ ) for 6-MeO-*N,N*-BQMAE (5) with  $\text{Cd}^{2+}$  and  $\text{Zn}^{2+}$  in DMF-HEPES buffer (1:1, 50 mM HEPES, 0.1 M KCl, pH = 7.5) at 25 °C.

**Figure S7.** Estimation of dissociation constants ( $K_d$ ) for TriMeO-*N,N*-BQMAE (6) with  $\text{Cd}^{2+}$  and  $\text{Zn}^{2+}$  in DMF-HEPES buffer (1:1, 50 mM HEPES, 0.1 M KCl, pH = 7.5) at 25 °C.

**Figure S8.** Estimation of LOD (limit of detection) for  $\text{Cd}^{2+}$  with TriMeO-*N,N*-BQMAE (**6**) in DMF-HEPES buffer (1:1, 50 mM HEPES, 0.1 M KCl, pH = 7.5) at 25 °C.

*<sup>1</sup>H/<sup>13</sup>C NMR spectra*.....S13-S19

**Figure S9.** <sup>1</sup>H NMR spectra of  $\text{Cd}^{2+}$  complex and free ligand of *N,N*-BQMAE (**4**) in DMSO-*d*<sub>6</sub>.

**Figure S10.** <sup>1</sup>H/<sup>13</sup>C NMR spectrum of *N,O*-BQMAE (**1**) in CDCl<sub>3</sub>.

**Figure S11.** <sup>1</sup>H/<sup>13</sup>C NMR spectrum of 6-MeO-*N,O*-BQMAE (**2**) in CDCl<sub>3</sub>.

**Figure S12.** <sup>1</sup>H/<sup>13</sup>C NMR spectrum of TriMeO-*N,O*-BQMAE (**3**) in CDCl<sub>3</sub>.

**Figure S13.** <sup>1</sup>H/<sup>13</sup>C NMR spectrum of *N,N*-BQMAE (**4**) in CDCl<sub>3</sub>.

**Figure S14.** <sup>1</sup>H/<sup>13</sup>C NMR spectrum of 6-MeO-*N,N*-BQMAE (**5**) in CDCl<sub>3</sub>.

**Figure S15.** <sup>1</sup>H/<sup>13</sup>C NMR spectrum of TriMeO-*N,N*-BQMAE (**6**) in CDCl<sub>3</sub>.

Scheme S1

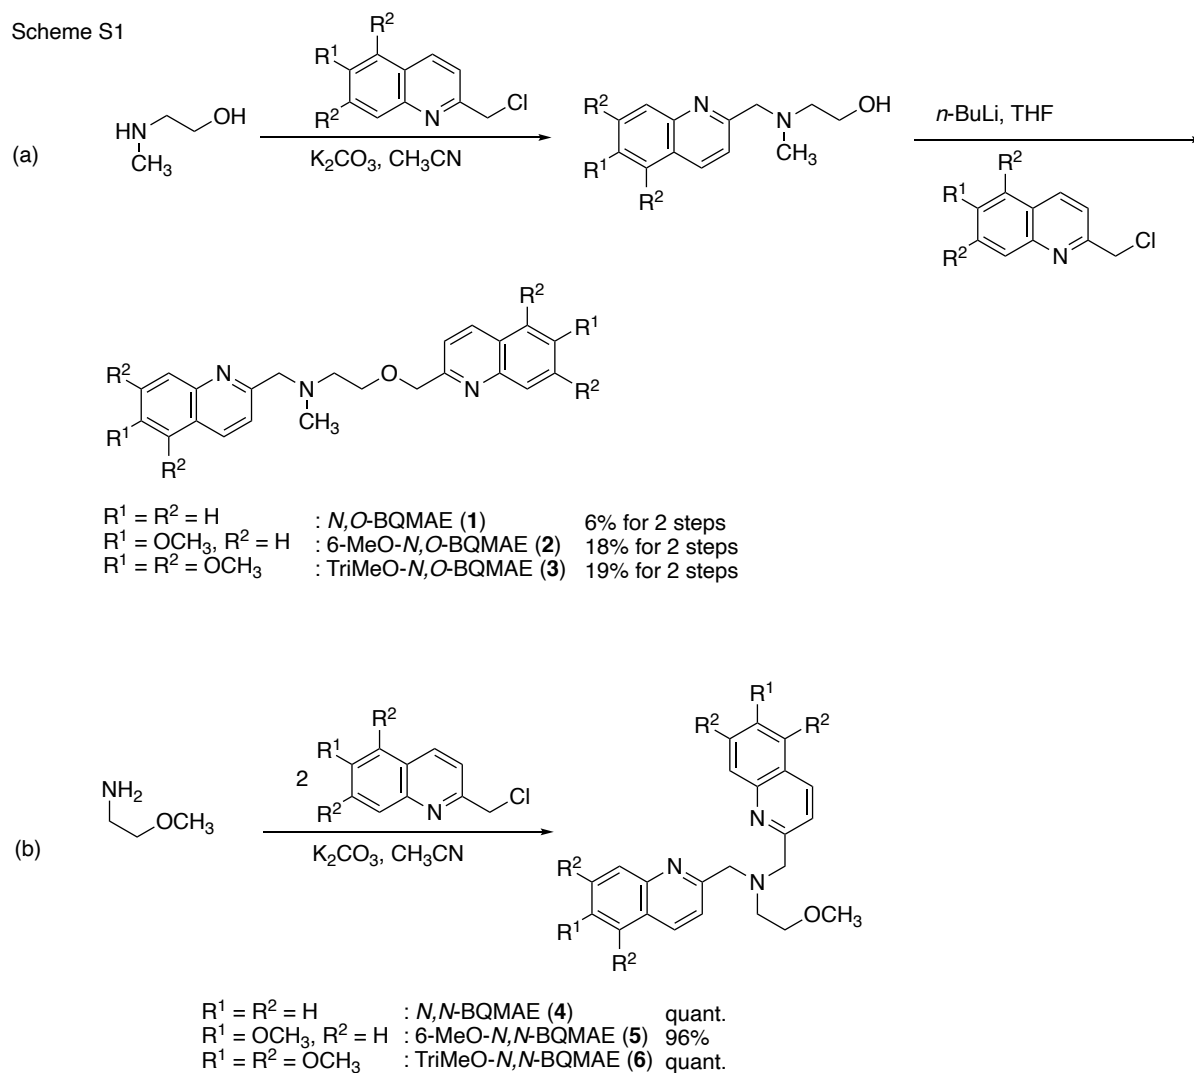

Scheme S1. Synthesis of ligands 1-6.

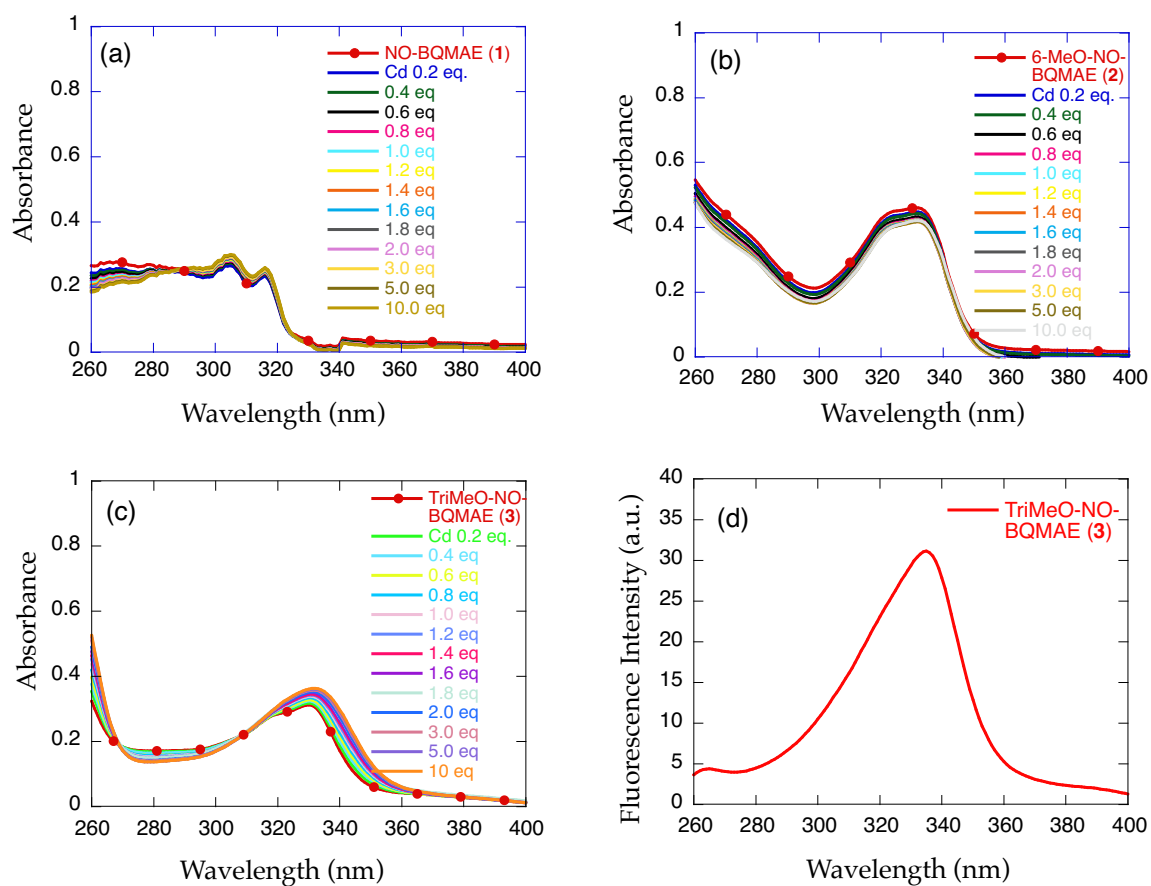

**Figure S1.** (a-c) Absorbance spectral changes of 34  $\mu\text{M}$  (a) *N,O*-BQMAE (1), (b) 6-MeO-*N,O*-BQMAE (2), and (c) TriMeO-*N,O*-BQMAE (3) in DMF-HEPES buffer (1:1, 50 mM HEPES, 0.1 M KCl, pH = 7.5) at 25  $^{\circ}\text{C}$  in the presence of increasing concentrations of Cd<sup>2+</sup>. (d) Excitation spectrum of 34  $\mu\text{M}$  TriMeO-*N,O*-BQMAE (3) in DMF-HEPES buffer (1:1, 50 mM HEPES, 0.1 M KCl, pH = 7.5) at 25  $^{\circ}\text{C}$  ( $\lambda_{\text{em}} = 445 \text{ nm}$ ).

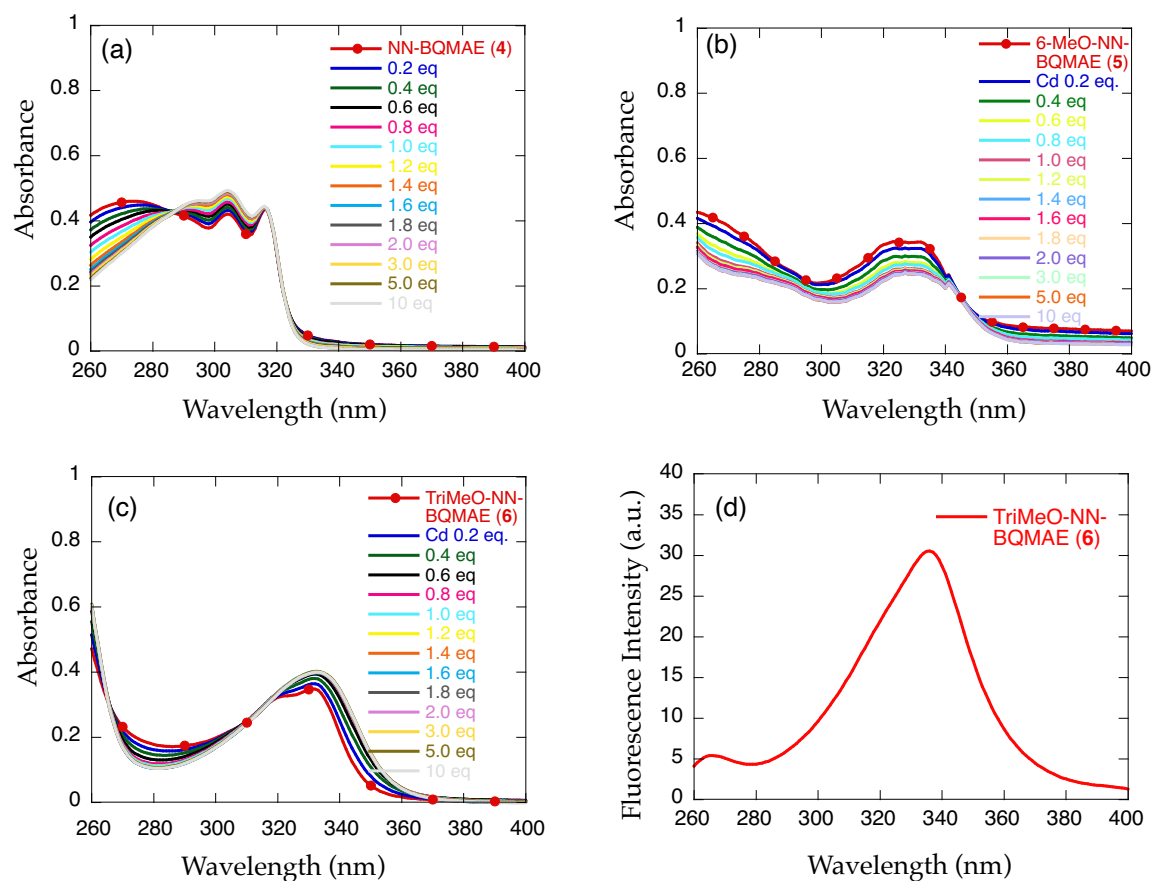

**Figure S2.** Absorbance spectral changes of 34  $\mu\text{M}$  (a) *NN*-BQMAE (4), (b) 6-MeO-*NN*-BQMAE (5), and (c) TriMeO-*NN*-BQMAE (6) in DMF-HEPES buffer (1:1, 50 mM HEPES, 0.1 M KCl, pH = 7.5) at 25  $^{\circ}\text{C}$  in the presence of increasing concentrations of Cd<sup>2+</sup>. (d) Excitation spectrum of 34  $\mu\text{M}$  TriMeO-*NN*-BQMAE (6) in DMF-HEPES buffer (1:1, 50 mM HEPES, 0.1 M KCl, pH = 7.5) at 25  $^{\circ}\text{C}$  ( $\lambda_{\text{em}} = 450 \text{ nm}$ ).

### Binding Constants for TriMeO-N,O-BQMAE

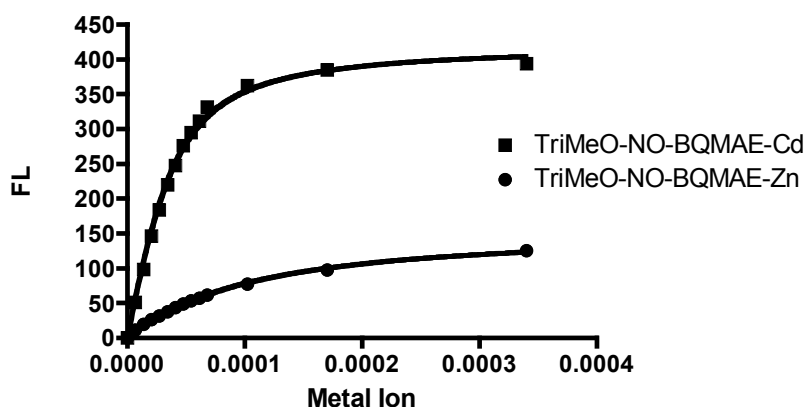

| Metal ion    | TriMeO-NO-BQMAE-Cd | TriMeO-NO-BQMAE-Zn |
|--------------|--------------------|--------------------|
| 0.000000     | 0.0000             | 0.0000             |
| 6.800000e-06 | 51.1170            | 11.2370            |
| 1.360000e-05 | 98.3680            | 19.1750            |
| 2.040000e-05 | 146.4600           | 26.1420            |
| 2.720000e-05 | 183.8400           | 31.8570            |
| 3.400000e-05 | 219.6400           | 37.6700            |
| 4.080000e-05 | 247.3800           | 43.8500            |
| 4.760000e-05 | 276.0400           | 48.5700            |
| 0.000054     | 294.7900           | 53.4740            |
| 0.000061     | 311.6200           | 56.8450            |
| 0.000068     | 331.3400           | 61.6890            |
| 0.000102     | 362.4900           | 77.2350            |
| 0.000170     | 384.4300           | 97.3500            |
| 0.000340     | 393.6600           | 125.4100           |

|                          | TriMeO-NO-BQMAE-Cd         | TriMeO-NO-BQMAE-Zn         |
|--------------------------|----------------------------|----------------------------|
| zinc binding 2/7/2008    |                            |                            |
| Best-fit values          |                            |                            |
| BMAX                     | 422.3                      | 155.7                      |
| KD                       | 1.3942e-005                | 8.2378e-005                |
| L0                       | 3.4000e-005                | 3.4000e-005                |
| Std. Error               |                            |                            |
| BMAX                     | 7.325                      | 3.254                      |
| KD                       | 1.1612e-006                | 4.0810e-006                |
| 95% Confidence Intervals |                            |                            |
| BMAX                     | 406.4 to 438.3             | 148.6 to 162.8             |
| KD                       | 1.1412e-005 to 1.6472e-005 | 7.3486e-005 to 9.1271e-005 |
| Goodness of Fit          |                            |                            |
| Degrees of Freedom       | 12                         | 12                         |
| R squared                | 0.9964                     | 0.9977                     |
| Absolute Sum of Squares  | 728.2                      | 33.80                      |
| Sy.x                     | 7.790                      | 1.678                      |
| Constraints              |                            |                            |
| L0                       | L0 = 3.4000e-005           | L0 = 3.4000e-005           |
| Data                     |                            |                            |
| Number of X values       | 14                         | 14                         |
| Number of Y replicates   | 1                          | 1                          |
| Total number of values   | 14                         | 14                         |
| Number of missing values | 0                          | 0                          |

**Figure S3.** Estimation of dissociation constants ( $K_d$ ) for TriMeO-N,O-BQMAE (**3**) with  $\text{Cd}^{2+}$  and  $\text{Zn}^{2+}$  in DMF-HEPES buffer (1:1, 50 mM HEPES, 0.1 M KCl, pH = 7.5) at 25 °C.

### Binding Constants for TriMeOBQDMEN in DMF-HEPES

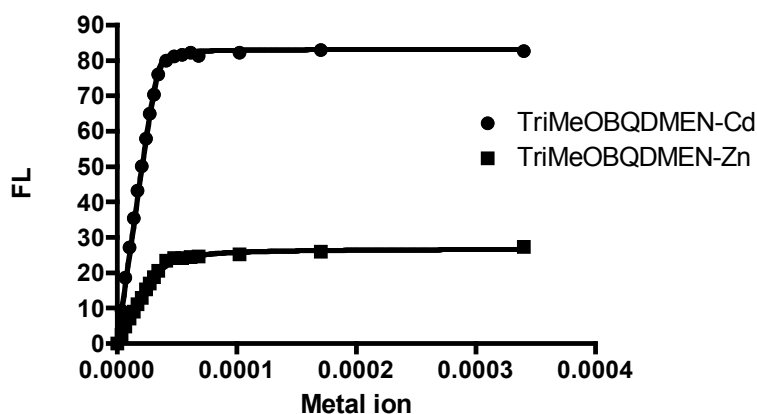

| Metal ion    | TriMeOBQDMEN-Cd | TriMeOBQDMEN-Zn |
|--------------|-----------------|-----------------|
| 0.000000     | 0.0000          | 0.0000          |
| 3.400000e-06 | 9.3527          | 2.4409          |
| 6.800000e-06 | 18.5970         | 4.7305          |
| 1.020000e-05 | 27.1440         | 6.9822          |
| 1.360000e-05 | 35.3300         | 9.0172          |
| 1.700000e-05 | 43.2540         | 11.0700         |
| 2.040000e-05 | 50.1000         | 12.9260         |
| 2.380000e-05 | 57.9580         | 15.3450         |
| 2.720000e-05 | 64.8850         | 16.9910         |
| 3.060000e-05 | 70.4170         | 18.7420         |
| 3.400000e-05 | 75.9780         | 20.5390         |
| 4.080000e-05 | 79.9820         | 23.3890         |
| 4.760000e-05 | 81.1540         | 24.1120         |
| 0.000054     | 81.6550         | 24.2070         |
| 0.000061     | 82.2410         | 24.4270         |
| 0.000068     | 81.3670         | 24.5970         |
| 0.000102     | 82.2600         | 25.2590         |
| 0.000170     | 82.9060         | 25.9550         |
| 0.000340     | 82.6460         | 27.3420         |

|                          | TriMeOBQDMEN-Cd            | TriMeOBQDMEN-Zn            |
|--------------------------|----------------------------|----------------------------|
| zinc binding 2/7/2008    |                            |                            |
| Best-fit values          |                            |                            |
| BMAX                     | 83.20                      | 26.78                      |
| KD                       | 2.5822e-007                | 2.6953e-006                |
| L0                       | 3.4000e-005                | 3.4000e-005                |
| Std. Error               |                            |                            |
| BMAX                     | 0.6129                     | 0.3782                     |
| KD                       | 9.1225e-008                | 4.1199e-007                |
| 95% Confidence Intervals |                            |                            |
| BMAX                     | 81.90 to 84.49             | 25.98 to 27.58             |
| KD                       | 6.5736e-008 to 4.5070e-007 | 1.8260e-006 to 3.5646e-006 |
| Goodness of Fit          |                            |                            |
| Degrees of Freedom       | 17                         | 17                         |
| R squared                | 0.9979                     | 0.9960                     |
| Absolute Sum of Squares  | 29.17                      | 5.554                      |
| Sy.x                     | 1.310                      | 0.5716                     |
| Constraints              |                            |                            |
| L0                       | L0 = 3.4000e-005           | L0 = 3.4000e-005           |
| Data                     |                            |                            |
| Number of X values       | 19                         | 19                         |
| Number of Y replicates   | 1                          | 1                          |
| Total number of values   | 19                         | 19                         |
| Number of missing values | 0                          | 0                          |

**Figure S4.** Estimation of dissociation constants ( $K_d$ ) for TriMeOBQDMEN with  $\text{Cd}^{2+}$  and  $\text{Zn}^{2+}$  in DMF-HEPES buffer (1:1, 50 mM HEPES, 0.1 M KCl, pH = 7.5) at 25 °C.

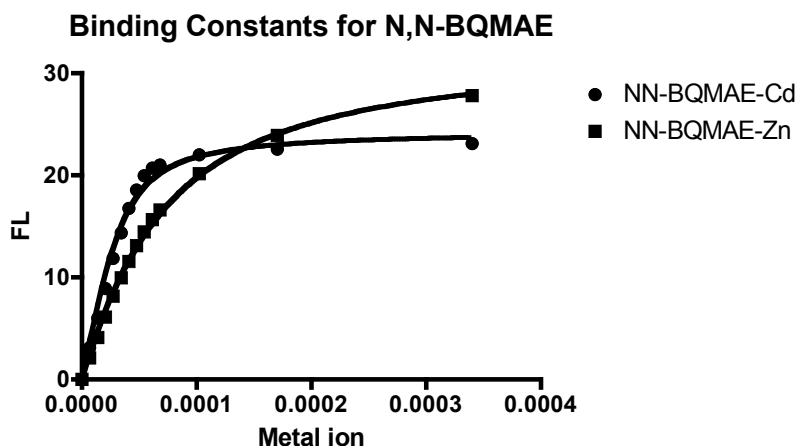

| Metal ion    | NN-BQMAE-Cd | NN-BQMAE-Zn |
|--------------|-------------|-------------|
| 0.000000     | 0.0000      | 0.0000      |
| 6.800000e-06 | 3.1244      | 2.0859      |
| 1.360000e-05 | 6.0068      | 4.0858      |
| 2.040000e-05 | 8.9059      | 6.1217      |
| 2.720000e-05 | 11.8270     | 8.1550      |
| 3.400000e-05 | 14.3630     | 9.9381      |
| 4.080000e-05 | 16.7620     | 11.5270     |
| 4.760000e-05 | 18.5480     | 13.0970     |
| 0.000054     | 19.9370     | 14.4450     |
| 0.000061     | 20.6780     | 15.6370     |
| 0.000068     | 20.9850     | 16.6130     |
| 0.000102     | 22.0060     | 20.1280     |
| 0.000170     | 22.5630     | 23.9060     |
| 0.000340     | 23.1240     | 27.8210     |

|                          | NN-BQMAE-Cd                | NN-BQMAE-Zn                |
|--------------------------|----------------------------|----------------------------|
| zinc binding 2/7/2008    |                            |                            |
| Best-fit values          |                            |                            |
| BMAX                     | 24.34                      | 32.60                      |
| KD                       | 8.1238e-006                | 5.1613e-005                |
| L0                       | 3.4000e-005                | 3.4000e-005                |
| Std. Error               |                            |                            |
| BMAX                     | 0.7345                     | 0.5430                     |
| KD                       | 1.5398e-006                | 2.3897e-006                |
| 95% Confidence Intervals |                            |                            |
| BMAX                     | 22.74 to 25.94             | 31.42 to 33.79             |
| KD                       | 4.7686e-006 to 1.1479e-005 | 4.6405e-005 to 5.6820e-005 |
| Goodness of Fit          |                            |                            |
| Degrees of Freedom       | 12                         | 12                         |
| R squared                | 0.9878                     | 0.9982                     |
| Absolute Sum of Squares  | 9.428                      | 1.576                      |
| Sy.x                     | 0.8864                     | 0.3624                     |
| Constraints              |                            |                            |
| L0                       | L0 = 3.4000e-005           | L0 = 3.4000e-005           |
| Data                     |                            |                            |
| Number of X values       | 14                         | 14                         |
| Number of Y replicates   | 1                          | 1                          |
| Total number of values   | 14                         | 14                         |
| Number of missing values | 0                          | 0                          |

**Figure S5.** Estimation of dissociation constants ( $K_d$ ) for *N,N*-BQMAE (**4**) with  $\text{Cd}^{2+}$  and  $\text{Zn}^{2+}$  in DMF-HEPES buffer (1:1, 50 mM HEPES, 0.1 M KCl, pH = 7.5) at 25 °C.

### Binding Constants for 6-MeO-N,N-BQMAE

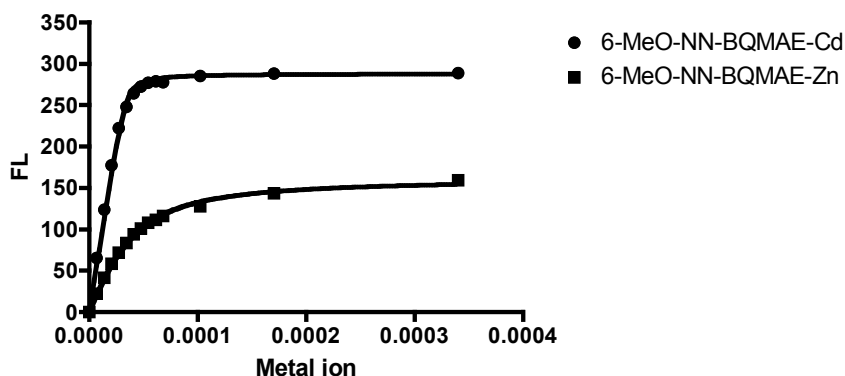

| Metal ion    | 6-MeO-NN-BQMAE-Cd | 6-MeO-NN-BQMAE-Zn |
|--------------|-------------------|-------------------|
| 0.000000     | 0.0000            | 0.0000            |
| 6.800000e-06 | 65.3900           | 21.9210           |
| 1.360000e-05 | 123.9200          | 41.4690           |
| 2.040000e-05 | 177.2100          | 58.0740           |
| 2.720000e-05 | 222.5100          | 72.0130           |
| 3.400000e-05 | 248.1700          | 83.6360           |
| 4.080000e-05 | 264.0200          | 93.9660           |
| 4.760000e-05 | 272.5700          | 100.6500          |
| 0.000054     | 276.9800          | 107.7000          |
| 0.000061     | 279.0500          | 111.3900          |
| 0.000068     | 277.7400          | 115.8900          |
| 0.000102     | 285.0900          | 127.7000          |
| 0.000170     | 288.1100          | 143.4800          |
| 0.000340     | 288.8300          | 159.1300          |

|                          | 6-MeO-NN-BQMAE-Cd          | 6-MeO-NN-BQMAE-Zn          |
|--------------------------|----------------------------|----------------------------|
| zinc binding 2/7/2008    |                            |                            |
| Best-fit values          |                            |                            |
| BMAX                     | 288.2                      | 162.4                      |
| KD                       | 6.4235e-007                | 1.6384e-005                |
| L0                       | 3.4000e-005                | 3.4000e-005                |
| Std. Error               |                            |                            |
| BMAX                     | 3.578                      | 2.524                      |
| KD                       | 2.2847e-007                | 1.1333e-006                |
| 95% Confidence Intervals |                            |                            |
| BMAX                     | 280.4 to 295.9             | 156.9 to 167.9             |
| KD                       | 1.4451e-007 to 1.1402e-006 | 1.3915e-005 to 1.8853e-005 |
| Goodness of Fit          |                            |                            |
| Degrees of Freedom       | 12                         | 12                         |
| R squared                | 0.9954                     | 0.9971                     |
| Absolute Sum of Squares  | 520.6                      | 79.27                      |
| Sy.x                     | 6.587                      | 2.570                      |
| Constraints              |                            |                            |
| L0                       | L0 = 3.4000e-005           | L0 = 3.4000e-005           |
| Data                     |                            |                            |
| Number of X values       | 14                         | 14                         |
| Number of Y replicates   | 1                          | 1                          |
| Total number of values   | 14                         | 14                         |
| Number of missing values | 0                          | 0                          |

**Figure S6.** Estimation of dissociation constants ( $K_d$ ) for 6-MeO-N,N-BQMAE (5) with  $\text{Cd}^{2+}$  and  $\text{Zn}^{2+}$  in DMF-HEPES buffer (1:1, 50 mM HEPES, 0.1 M KCl, pH = 7.5) at 25 °C.

### Binding Constants for TriMeO-N,N-TriMeOBQMAE

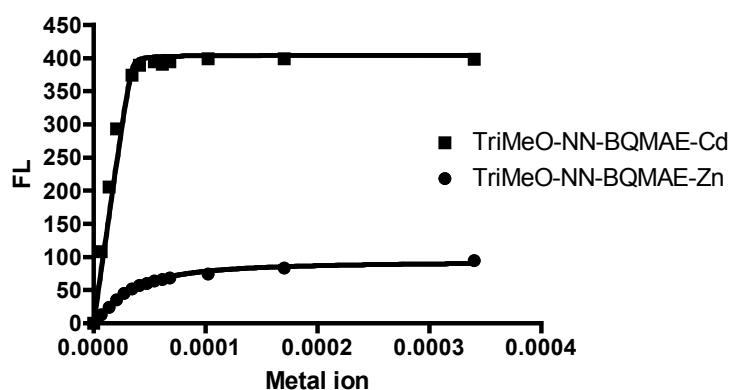

| Metal ion | TriMeO-NN-BQMAE-Cd  | TriMeO-NN-BQMAE-Zn |
|-----------|---------------------|--------------------|
| 0.000000  | 0.0000              | 0.0000             |
| 0.000007  | 108.1000            | 12.4700            |
| 0.000014  | 205.7600            | 24.2960            |
| 0.000020  | 292.9800            | 35.6160            |
| 0.000027  | <del>353.3200</del> | 45.0430            |
| 0.000034  | 373.9900            | 51.4780            |
| 0.000041  | 389.1300            | 56.7180            |
| 0.000048  | <del>393.0700</del> | 60.3440            |
| 0.000054  | 394.5300            | 63.8650            |
| 0.000061  | 390.8200            | 65.9310            |
| 0.000068  | 394.7800            | 67.9110            |
| 0.000102  | 399.1800            | 74.3840            |
| 0.000170  | 399.0200            | 83.3340            |
| 0.000340  | 398.3100            | 94.6870            |

|                          | TriMeO-NN-BQMAE-Cd          | TriMeO-NN-BQMAE-Zn         |
|--------------------------|-----------------------------|----------------------------|
| zinc binding 2/7/2008    |                             |                            |
| Best-fit values          |                             |                            |
| BMAX                     | 404.4                       | 94.26                      |
| KD                       | 1.3580e-007                 | 1.4635e-005                |
| L0                       | 3.4000e-005                 | 3.4000e-005                |
| Std. Error               |                             |                            |
| BMAX                     | 11.16                       | 2.273                      |
| KD                       | 3.0388e-007                 | 1.6558e-006                |
| 95% Confidence Intervals |                             |                            |
| BMAX                     | 379.5 to 429.2              | 89.31 to 99.22             |
| KD                       | -5.4123e-007 to 8.1284e-007 | 1.1027e-005 to 1.8243e-005 |
| Goodness of Fit          |                             |                            |
| Degrees of Freedom       | 10                          | 12                         |
| R squared                | 0.9704                      | 0.9927                     |
| Absolute Sum of Squares  | 5997                        | 68.35                      |
| Sy.x                     | 24.49                       | 2.387                      |
| Constraints              |                             |                            |
| L0                       | L0 = 3.4000e-005            | L0 = 3.4000e-005           |
| Data                     |                             |                            |
| Number of X values       | 14                          | 14                         |
| Number of Y replicates   | 1                           | 1                          |
| Total number of values   | 12                          | 14                         |
| Number of missing values | 2                           | 0                          |

**Figure S7.** Estimation of dissociation constants ( $K_d$ ) for TriMeO-*N,N*-BQMAE (6) with  $\text{Cd}^{2+}$  and  $\text{Zn}^{2+}$  in DMF-HEPES buffer (1:1, 50 mM HEPES, 0.1 M KCl, pH = 7.5) at 25 °C.

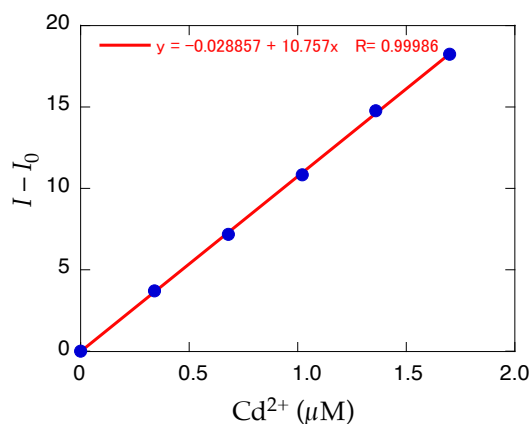

**Figure S8.** Estimation of LOD (limit of detection) for  $\text{Cd}^{2+}$  with TriMeO-*N,N*-BQMAE (6) in DMF-HEPES buffer (1:1, 50 mM HEPES, 0.1 M KCl, pH = 7.5) at 25 °C. The  $3\sigma$  value ( $\sigma$  corresponds to standard deviation from 6 measurements) of blank solution (34  $\mu\text{M}$  TriMeOBQMOA (9)) is 0.183402 in fluorescence intensity unit, which corresponds to 17 nM from the slope of the liner dynamic fluorescence intensity plot ( $k$ ) shown above ( $\text{LOD} = 3\sigma/k$ ). The LOQ (limit of quantitation) is calculated to be 57 nM ( $\text{LOQ} = 10\sigma/k$ ).

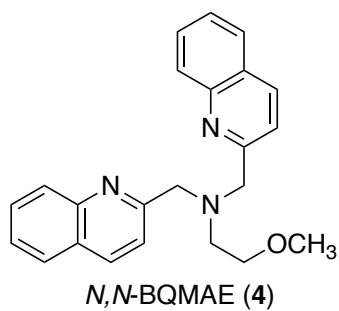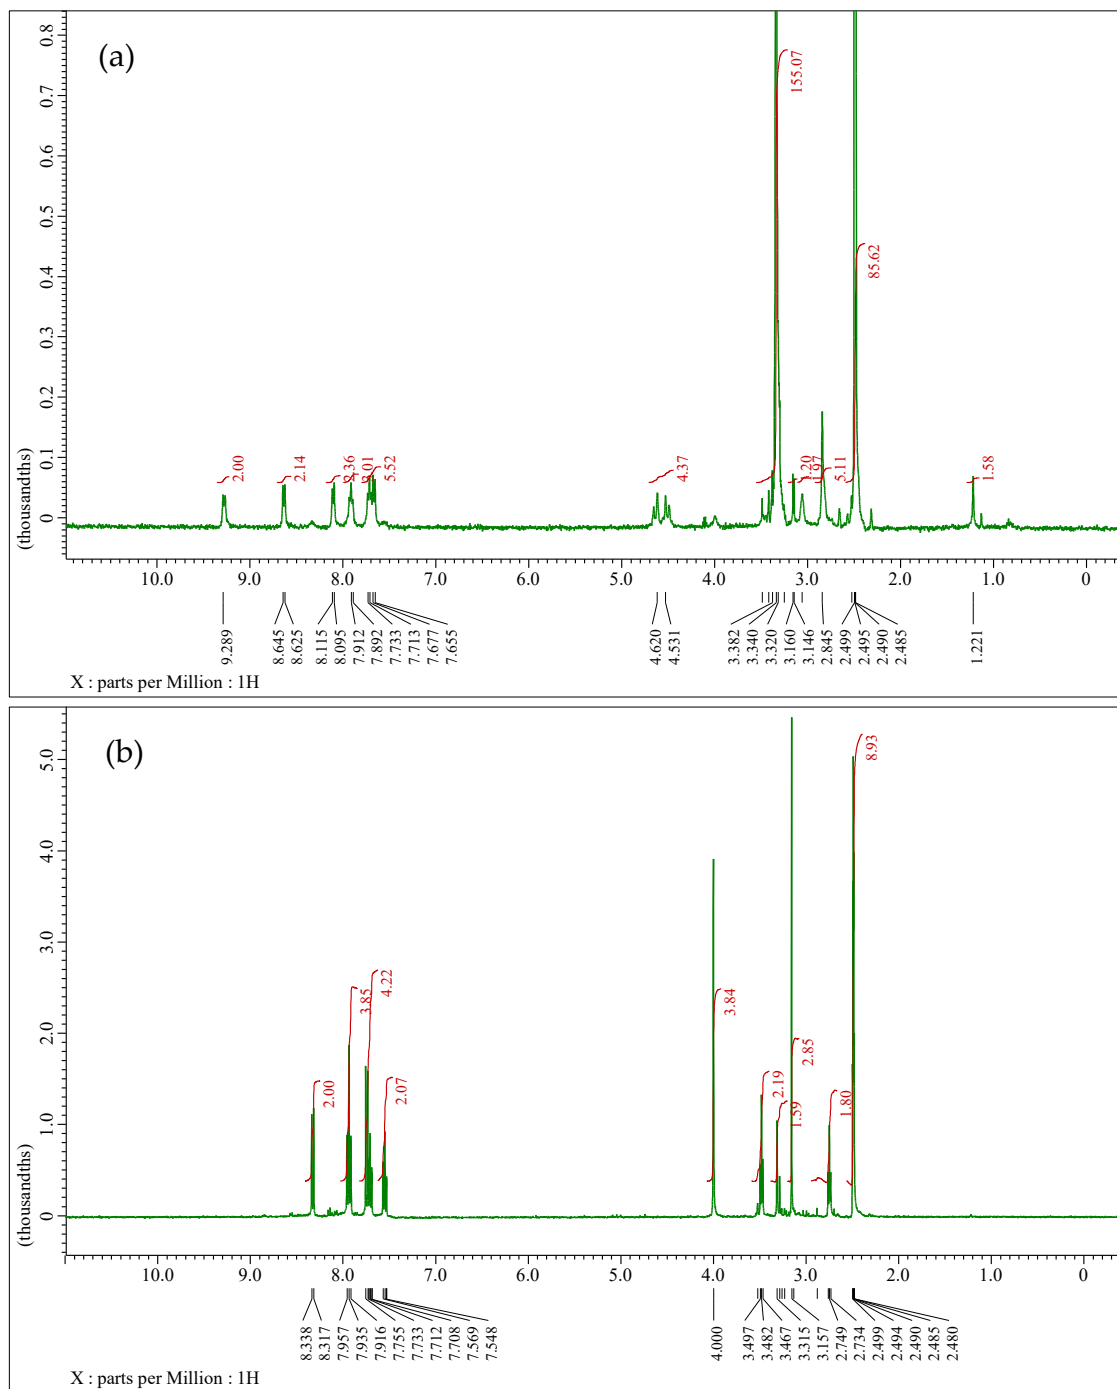

**Figure S9.**  $^1\text{H}$  NMR spectra of (a)  $\text{Cd}^{2+}$  complex and (b) free ligand of *N,N*-BQMAE (4) in  $\text{DMSO-}d_6$ .

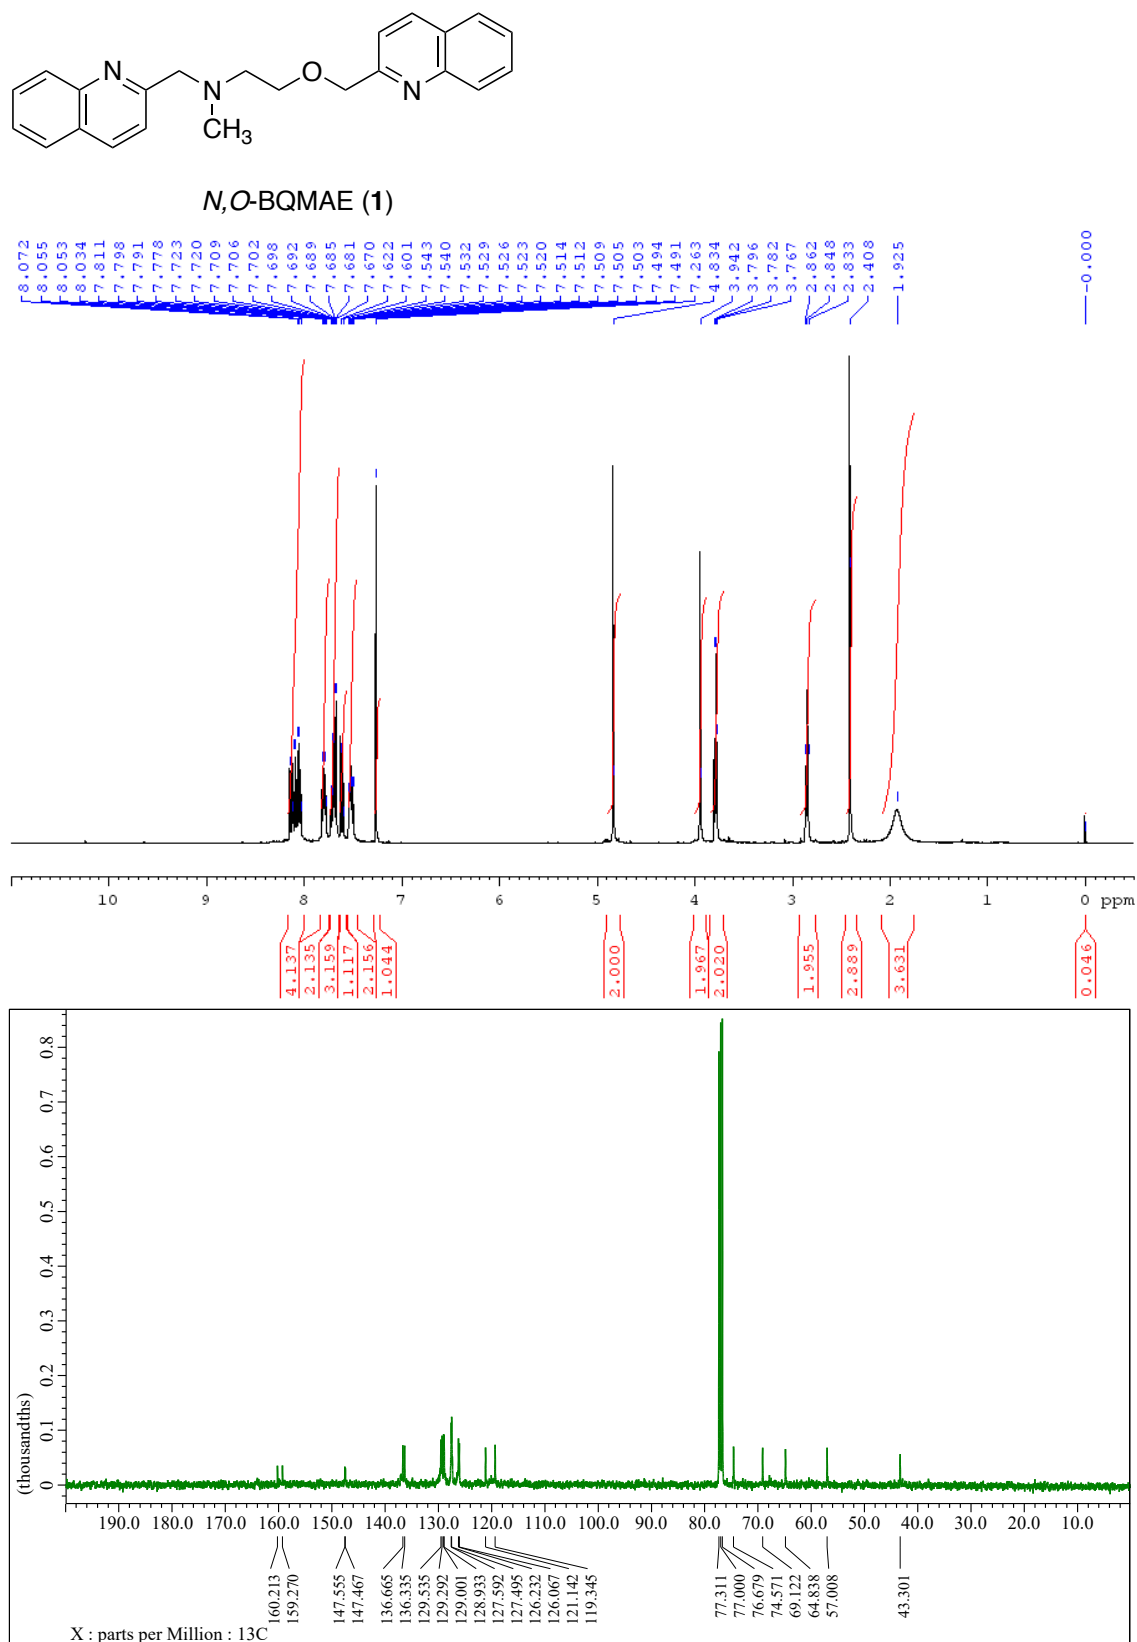

**Figure S10.** <sup>1</sup>H/<sup>13</sup>C NMR spectrum of *N,O*-BQMAE (1) in CDCl<sub>3</sub>.

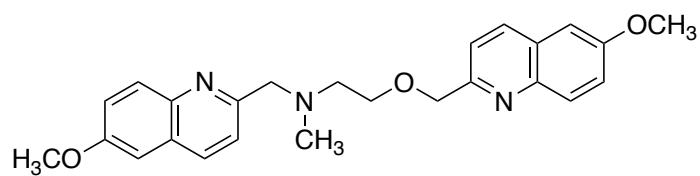6-MeO-*N,O*-BQMAE (2)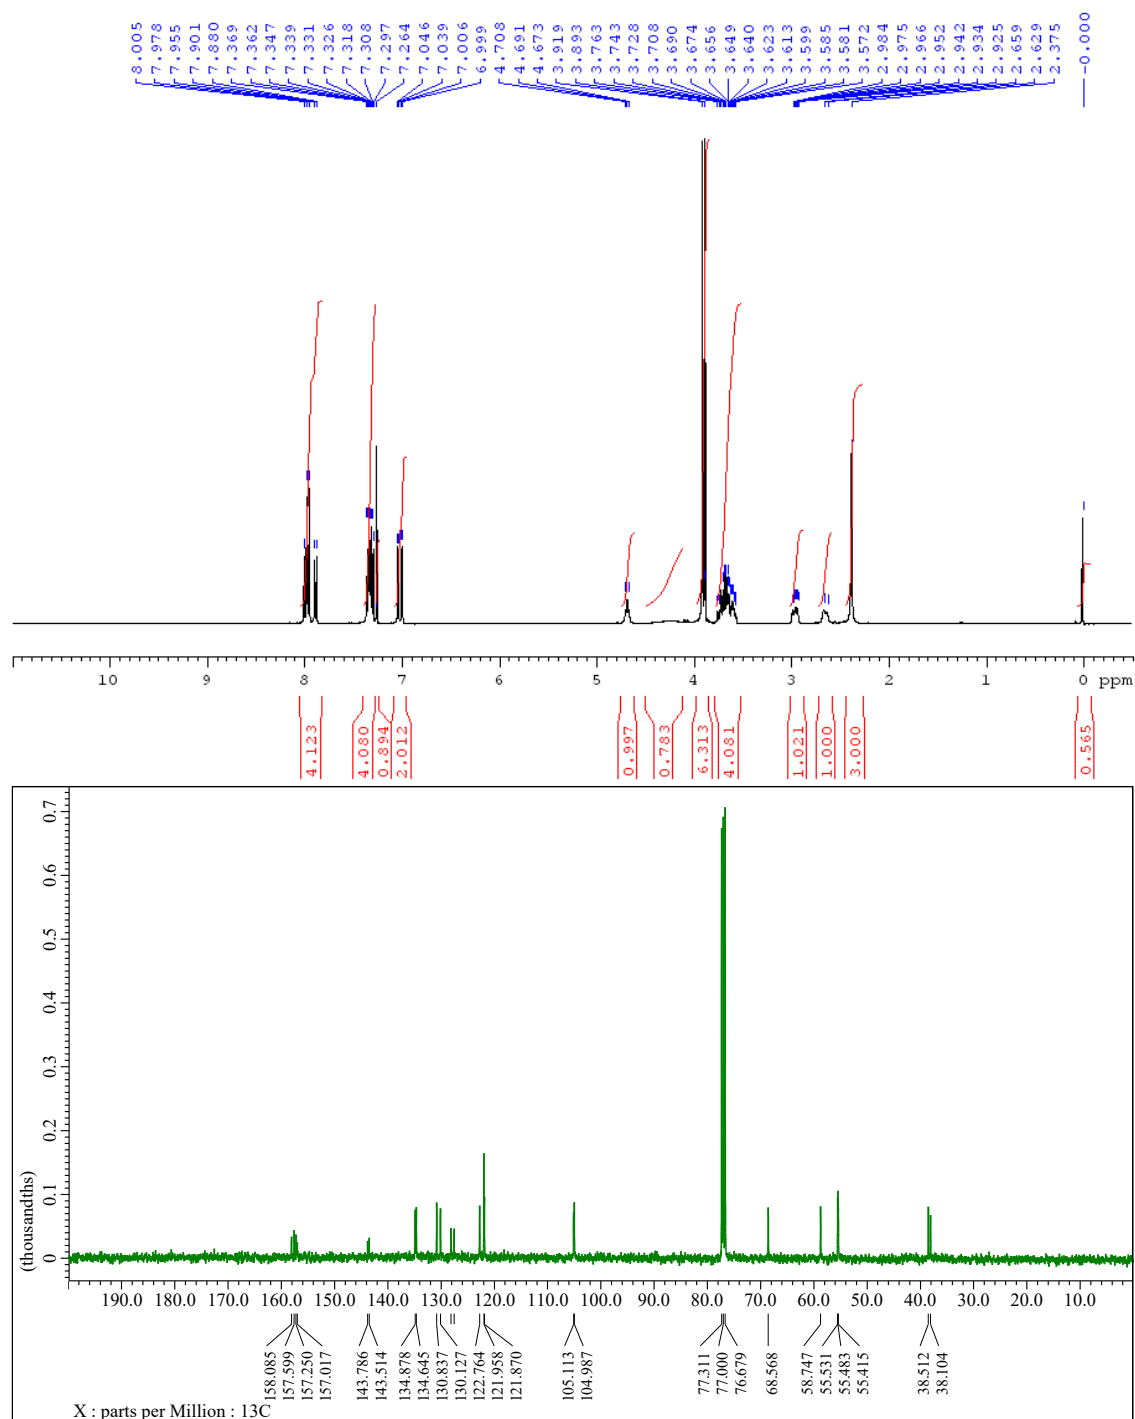Figure S11. <sup>1</sup>H/<sup>13</sup>C NMR spectrum of 6-MeO-*N,O*-BQMAE (2) in CDCl<sub>3</sub>.

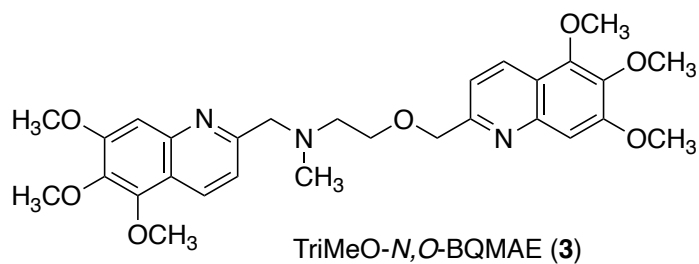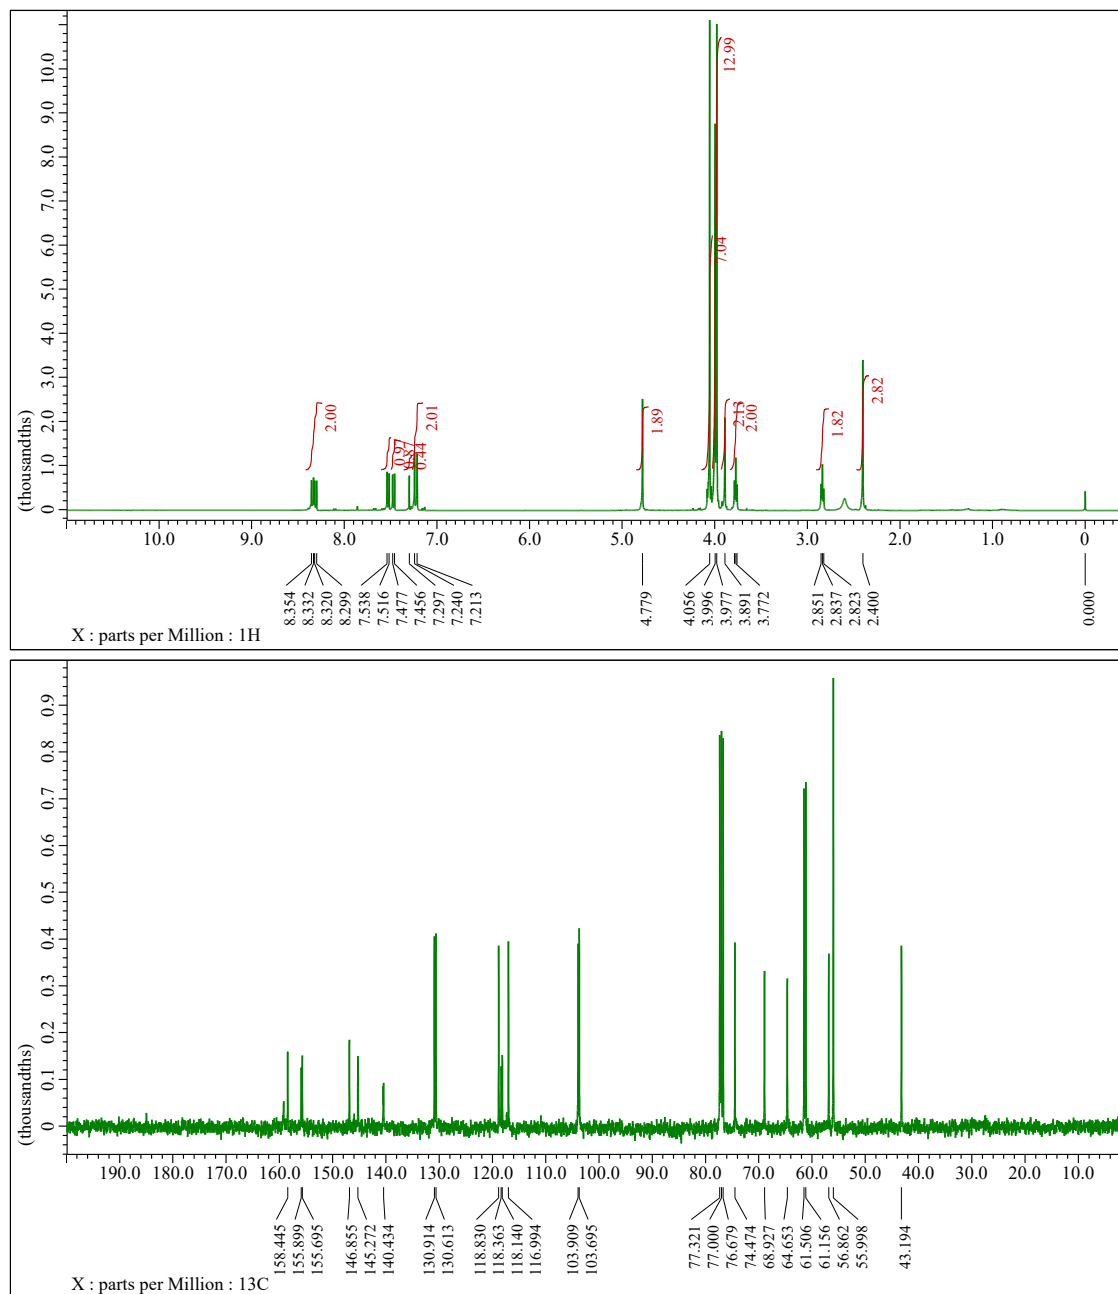

**Figure S12.** <sup>1</sup>H/<sup>13</sup>C NMR spectrum of TriMeO-*N,O*-BQMAE (**3**) in CDCl<sub>3</sub>.

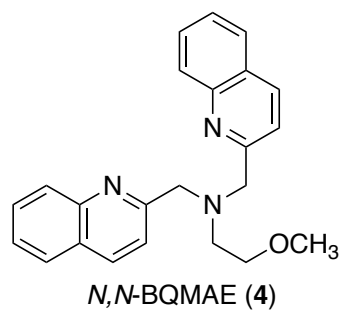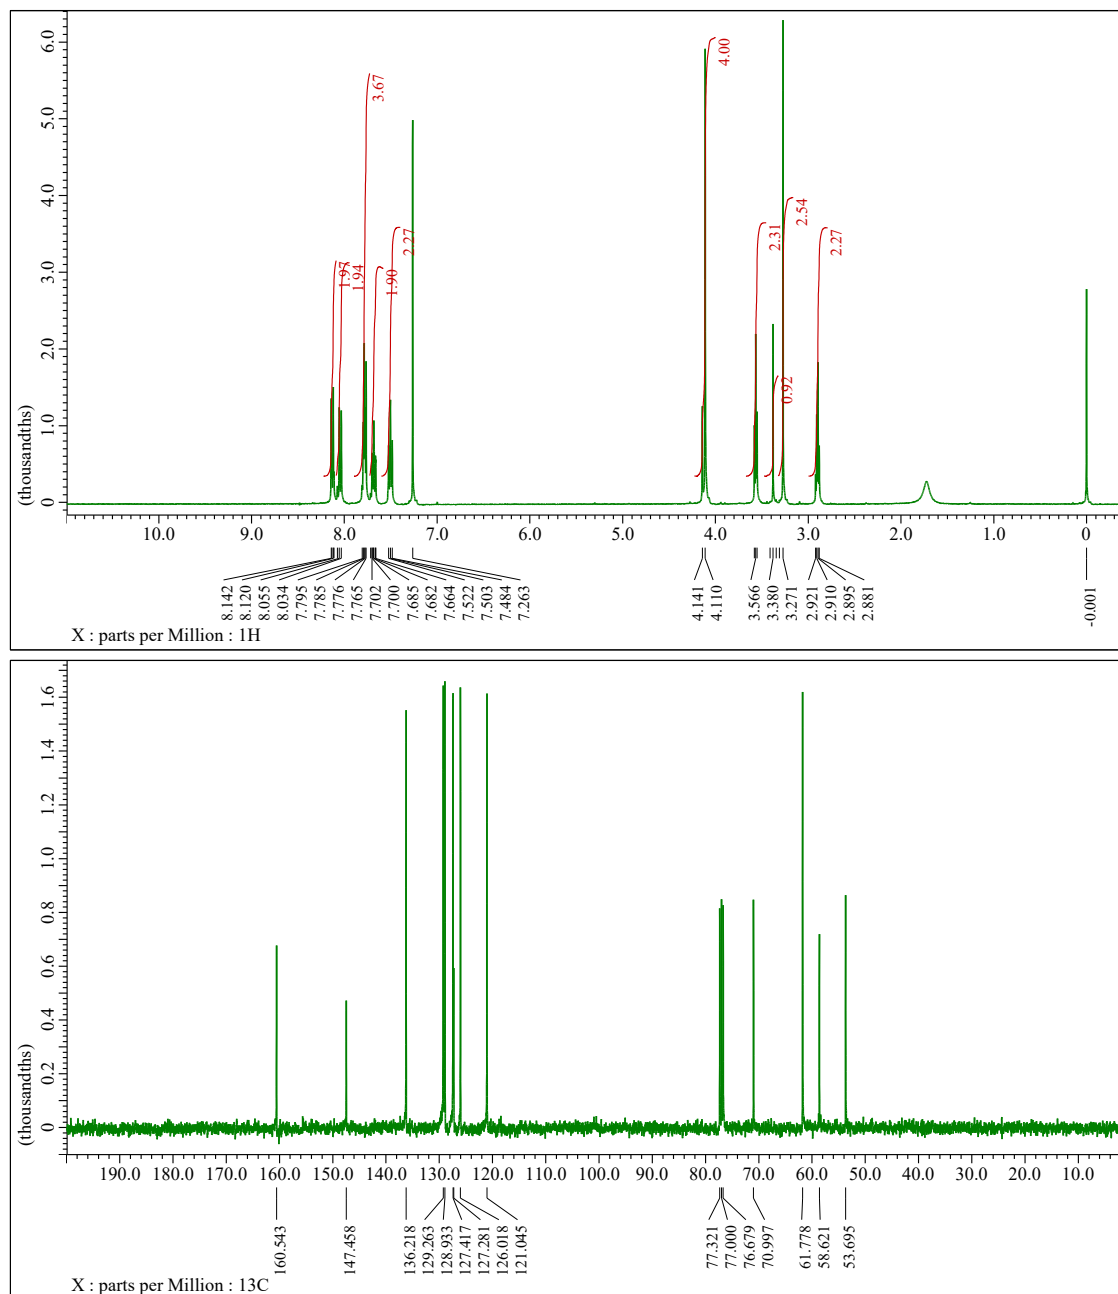

**Figure S13.** <sup>1</sup>H/<sup>13</sup>C NMR spectrum of *N,N*-BQMAE (4) in CDCl<sub>3</sub>.

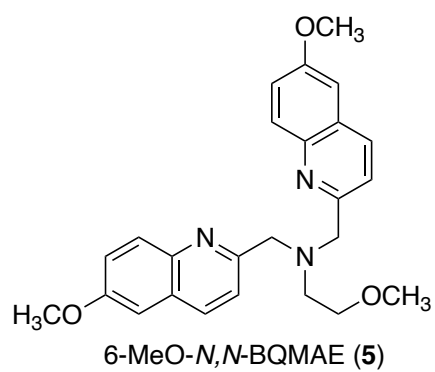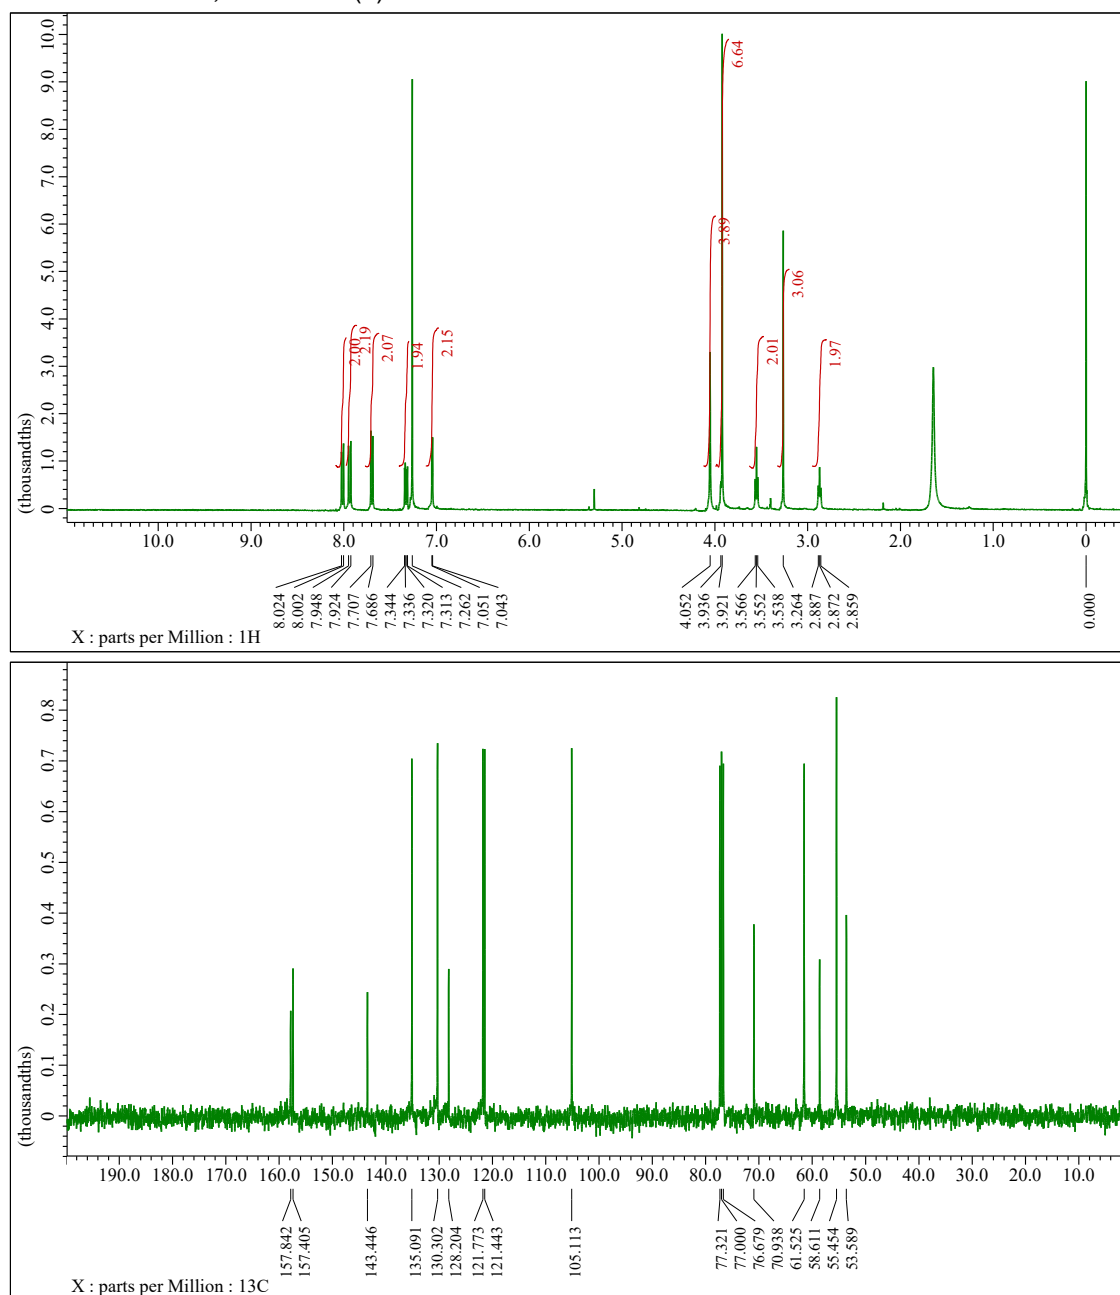

**Figure S14.**  $^1\text{H}/^{13}\text{C}$  NMR spectrum of 6-MeO-*N,N*-BQMAE (5) in  $\text{CDCl}_3$ .

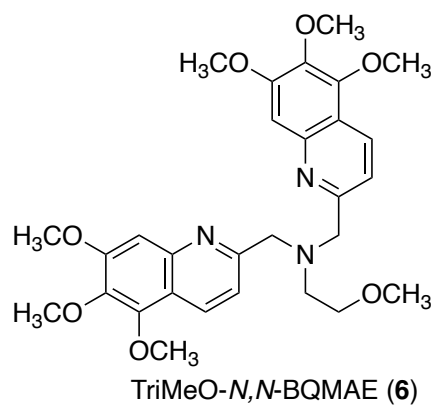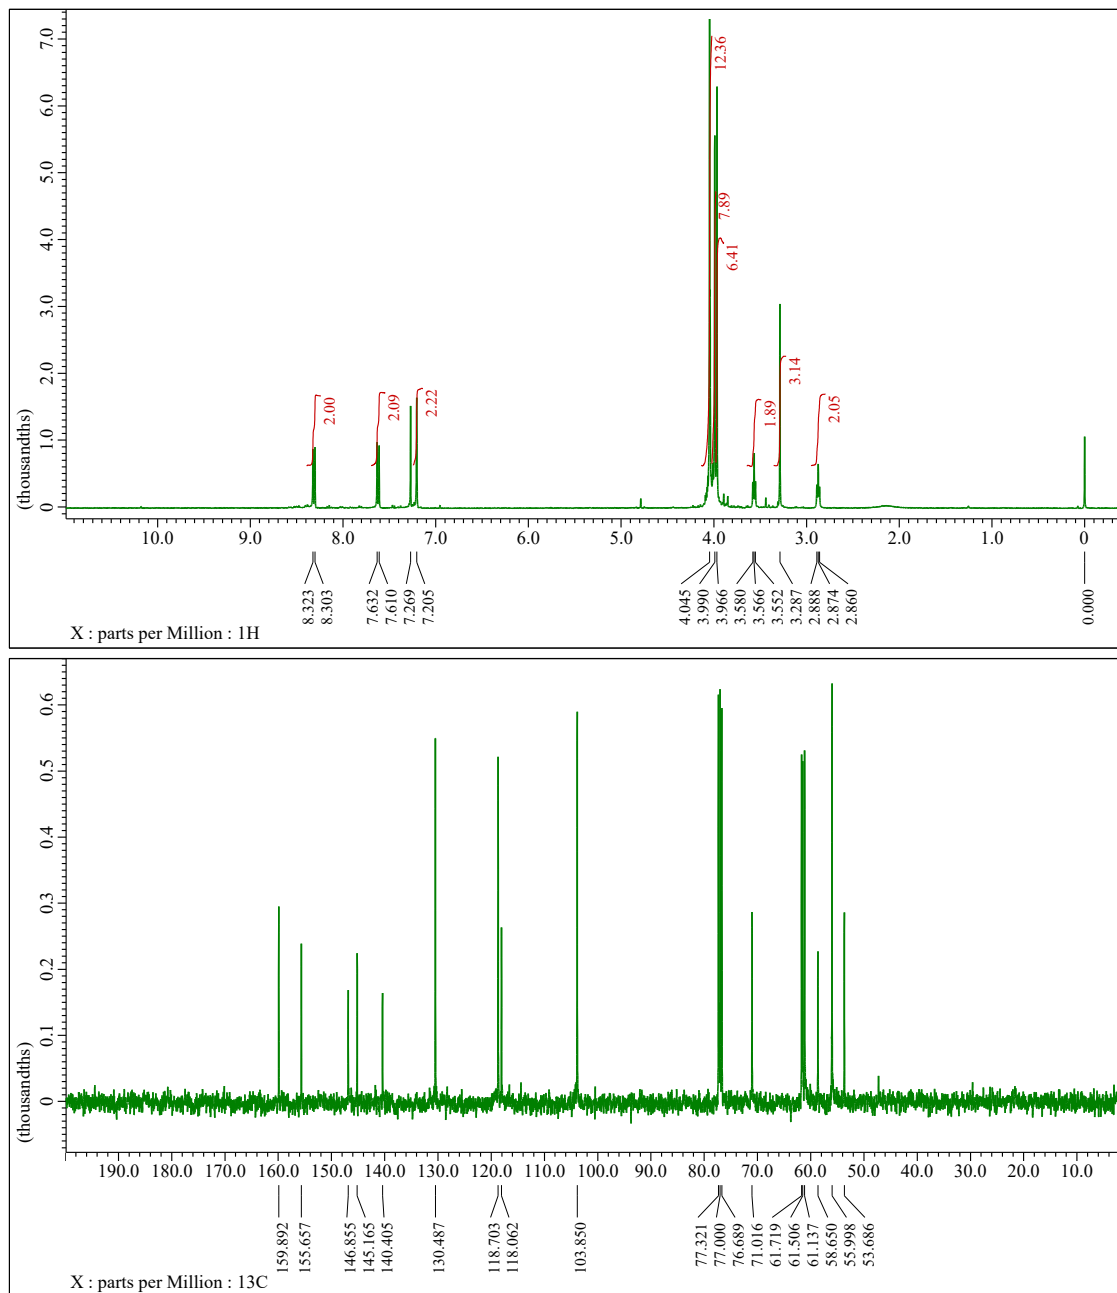

**Figure S15.** <sup>1</sup>H/<sup>13</sup>C NMR spectrum of TriMeO-*N,N*-BQMAE (**6**) in CDCl<sub>3</sub>.
